# Supplementary material
Source: PubMed Central journal article supplement (PMC3083263)
Supplement: NIHMS62456-supplement-si20070202_013.pdf [file NIHMS62456-supplement-si20070202_013.pdf]

## Supporting Information for:

Elucidation of Double Bond Position in Unsaturated Lipids by Ozone Electrospray  
Ionization Mass Spectrometry (OzESI-MS)

Michael C. Thomas,<sup>†</sup> Todd W. Mitchell,<sup>‡</sup> David G. Harman,<sup>†</sup> Jane M. Deeley,<sup>†</sup> Robert C. Murphy,<sup>§</sup>  
Stephen J. Blanksby<sup>\*†</sup>

<sup>†</sup> Department of Chemistry, University of Wollongong, Wollongong NSW 2522, Australia.

<sup>‡</sup> School of Health Sciences, University of Wollongong, Wollongong NSW 2522, Australia.

<sup>§</sup> Department of Pharmacology, University of Colorado at Denver and Health Sciences Center, Aurora  
CO 80045, USA

\*Address reprint requests to Dr Stephen J. Blanksby, Department of Chemistry, University of  
Wollongong, Wollongong NSW, 2522, Australia. E-mail [blanksby@uow.edu.au](mailto:blanksby@uow.edu.au)

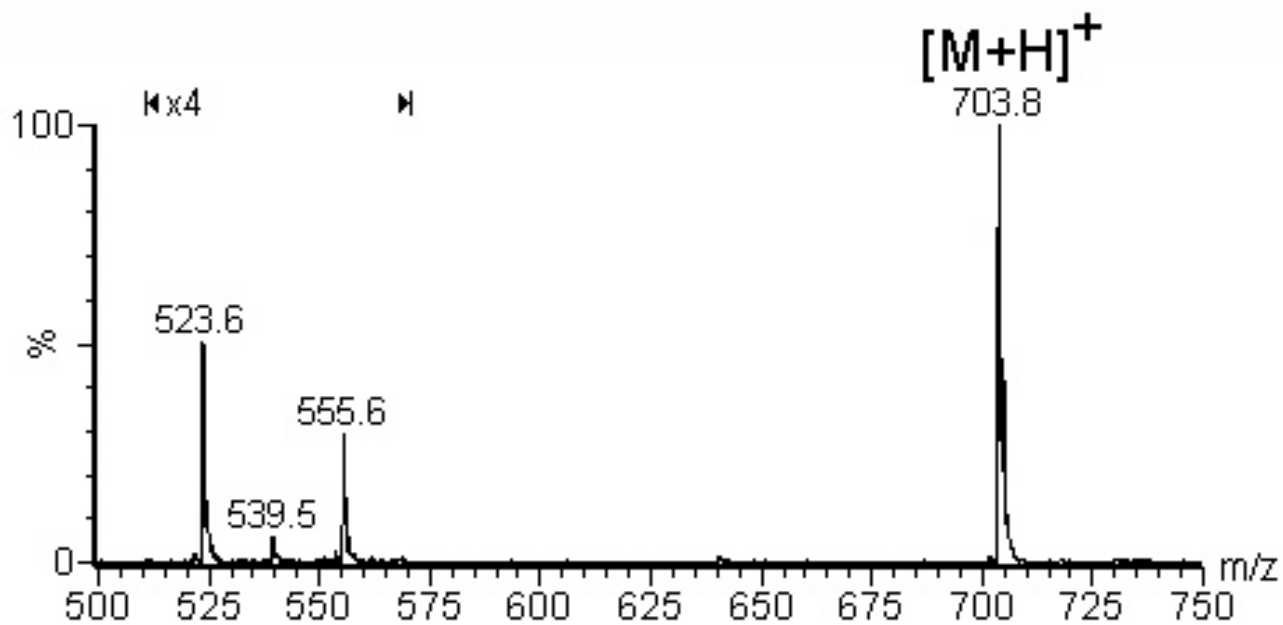

**Figure S-1.** The OzESI-MS spectrum of a 1  $\mu$ M methanolic solution of SM(d18:1/16:0) recorded as a  $m/z$  184 precursor ion scan and thus showing only the  $[M+H]^+$  molecular ion and corresponding chemically induced fragment ions.
